# Supplementary material for: Formation of Prenylated Chalcone Xanthohumol Cocrystals: Single Crystal X-ray Diffraction, Vibrational Spectroscopic Study Coupled with Multivariate Analysis
Source: MDPI journal article supplement (doi:10.3390/molecules24234245), 2019-11-21
Supplement: s1 [file s1]

## Supplementary Materials

*Article*

# Formation of Prenylated Chalcone Xanthohumol Cocrystals: Single Crystal X-ray Diffraction, Vibrational Spectroscopic Study Coupled with Multivariate Analysis

Iwona Budziak <sup>1</sup>, Marta Arczewska <sup>2,\*†</sup>, Daniel M. Kamiński <sup>3,\*†</sup>

<sup>1</sup> Department of Chemistry, University of Life Sciences in Lublin, Akademicka 15, 20-950 Lublin, Poland; iwona.budziak@up.lublin.pl

<sup>2</sup> Department of Biophysics, University of Life Sciences in Lublin, Akademicka 13, 20-950 Lublin, Poland

<sup>3</sup> Department of General and Coordination Chemistry and Crystallography, Institute of Chemical Sciences, Maria Curie-Skłodowska University in Lublin, pl. Marii Curie-Skłodowskiej 2, 20-031 Lublin, Poland

\* Correspondence: marta.arczewska@up.lublin.pl (M.A.); daniel.kaminski@umcs.pl (D.M.K.); Tel./Fax: +(48-81)445-69-05 (M.A.); Tel./Fax: +(48-81)537-56-44 (D.M.K.)

† The authors contributed equally to this paper.

## Crystallographic information file

XN\_AC, XN\_NIC, XN\_CF, XN\_GA CIF files

**Figure S1.**  $d_{\text{norm}}$  mapped on Hirshfeld surface for the target cocrystals a) XN–NIC, b) XN–CF, c) single XN molecule with AC, d) single XN molecule with GA, e) asymmetric part of unit cell of XN–AC, and f) asymmetric part of unit cell of XN–GA..... 3

**Figure S2.** Fingerprints plots of a) XN–NIC, b) XN–CF, c) XN–AC, and d) N–GA.....4

**Figure S3.** Related close contact contributions of intermolecular interactions to the Hirshfeld surface area of the target cocrystals..... 5

**Figure S4.** FT-IR spectra for the coformers, the target cocrystals and physical mixtures. All spectra were normalized at the maximum intensity in the range between 1750–600  $\text{cm}^{-1}$ ..... 6

**Figure S5.** Raman spectra of coformers, the target cocrystals and XN crystal. (a) XN–NIC, (b) XN–GA, (c) XN–AC and (d) XN–CF. All Raman spectra were normalized to the most intense band in the range 1750 – 600  $\text{cm}^{-1}$ ..... 8

**Table S2.** Band assignments for the data the data acquired form Raman spectroscopy. .... 9

**Figure S6.** Scree plot obtained from PCA. Raman spectroscopy in the range 1700 – 1000  $\text{cm}^{-1}$  (a), FTIR spectroscopy in the range 3700 – 2700  $\text{cm}^{-1}$  (b), and 1800 – 1000  $\text{cm}^{-1}$  (c)..... 10

**Figure S7.** PCA 2D score plots. PC1 and PC3 (a), PC2 and PC3 (b) calculated based on Raman spectroscopy data..... 11

**Figure S8.** PC1, PC2 and PC3 correlation loading plots. .... 12

**Figure S9.** PCA 2D score plot: PC1 and PC3 (a), PC2 and PC3 (b) calculated based on the FT-IR data in the range 3700 – 2700  $\text{cm}^{-1}$  (red symbols represent the physical mixtures, blue symbols – the cocrystals, black symbol –XN)..... 13

**Figure S10.** PCA 2D score plot: PC1 and PC3 (a), PC2 and PC3 (b) calculated based on the FT-IR data in the range 1800 – 1000  $\text{cm}^{-1}$  (red symbols represent the physical mixtures, blue symbols – the cocrystals, black symbol –XN)..... 14

**Figure S11.** PC1, PC2 and PC3 correlation loading plots. The regions (a) 3700 – 2700  $\text{cm}^{-1}$  and (b) 1800 – 1000  $\text{cm}^{-1}$ ..... 15

**Figure S12.** X-ray powder diffraction patterns obtained after XN grinding with selected coformers (NIC, AC and GA). Based on the data it is difficult to conclude if the samples are cocrystals or a physical mixture of compounds..... 16

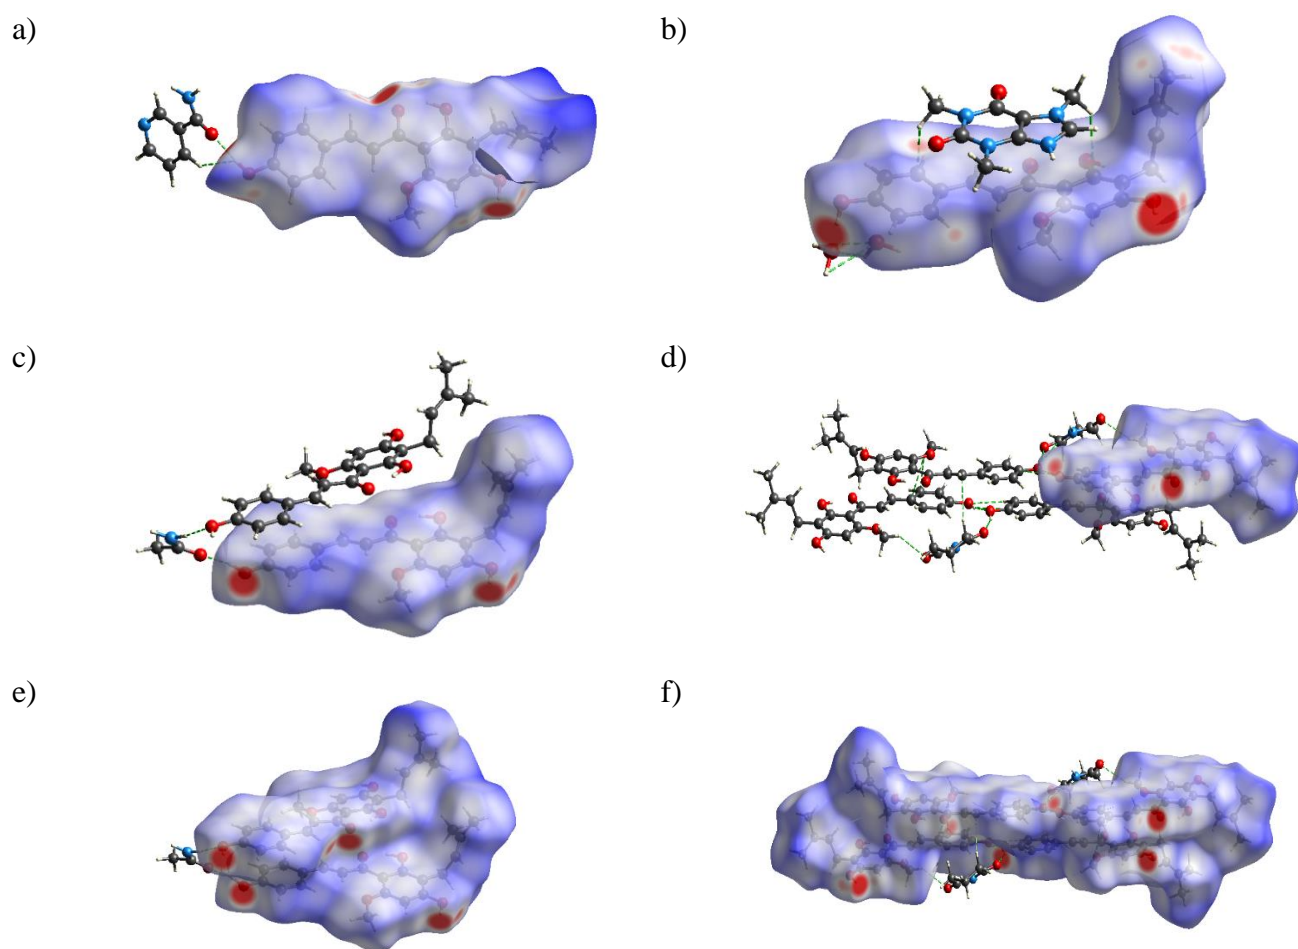

**Figure S1.**  $d_{\text{norm}}$  mapped on Hirshfeld surface for the target cocrystals (a) XN-NIC, (b) XN-CF, (c) single XN molecule with AC, (d) single XN molecule with GA, (e) asymmetric part of unit cell of XN-AC, and (f) asymmetric part of unit cell of XN-GA. The normalized distance  $d_{\text{norm}}$  to the nearest nuclei is marked and connected with strength of all types of the intermolecular contacts. The hydrogen bonds of the O...H contacts type are visible as the largest red spots. The red spots indicate the O...H bonds between the XN and the selected coformer molecules, and also the O...H interactions between the opposite XN molecules.

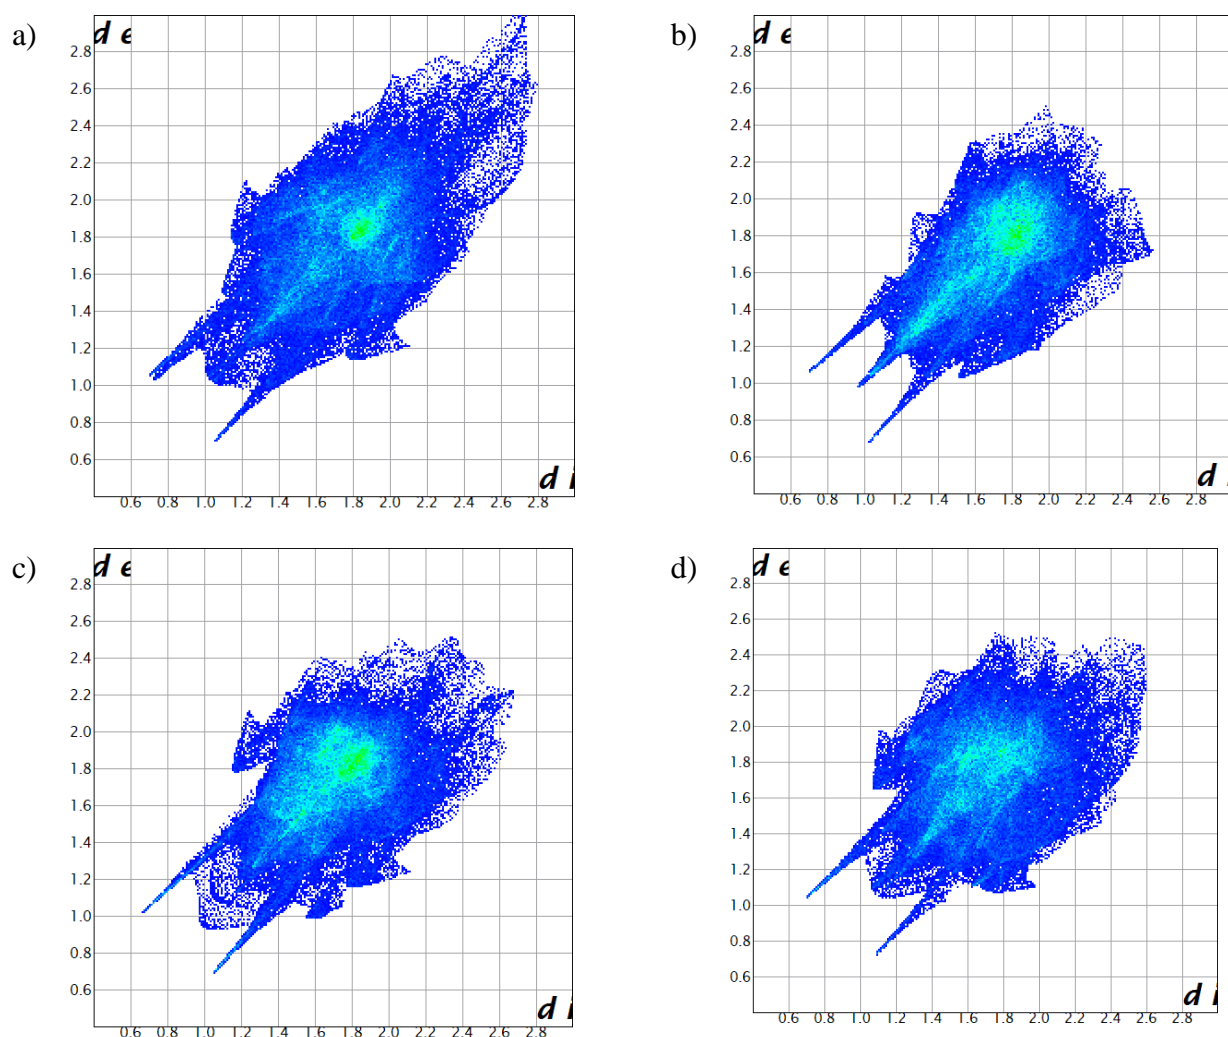

**Figure S2.** Fingerprints plots of (a) XN–NIC, (b) XN–CF, (c) XN–AC, and (d) XN–GA. The fingerprint plots show that the distributions of the nearby exterior ( $d_e$ ) and interior ( $d_i$ ) atom distances are very similar to the  $H\cdots O$  and  $O\cdots H$  interactions in all XN cocrystals. The significant contribution of polar interactions ( $O\cdots H/H\cdots O$  and  $N\cdots H/H\cdots N$ ) is shown as long sharp spikes in all the cocrystals. The  $C\cdots H/H\cdots C$  show a symmetric pair of wings while the  $H\cdots H$  contacts show asymmetric spots spread over a large area as broad peaks in all the cocrystals. The overall 2D fingerprint plots are similar to each other with subtle changes in the percentage contribution of these contacts.

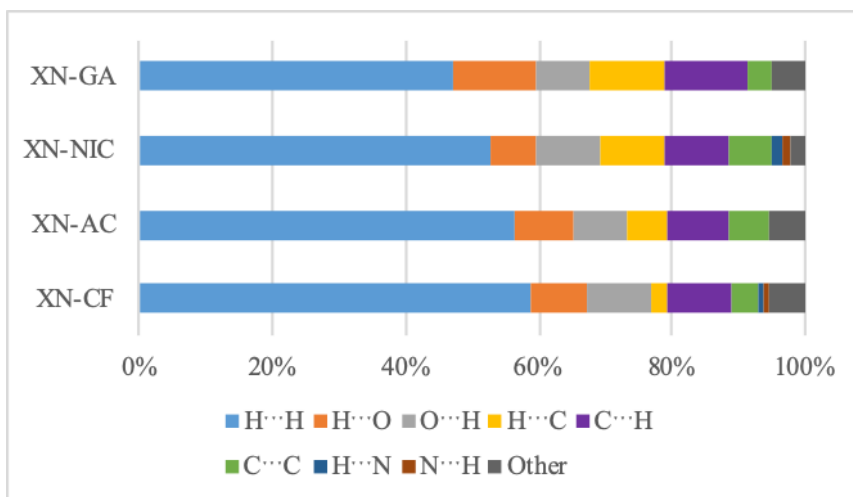

**Figure S3.** Related close contact contributions of intermolecular interactions to the Hirshfeld surface area of the target cocrystals. As can be seen, the structures are dominated by the weak H...H contact in the range from 47.1% to 58.7%. The contribution of the other contacts (O...H/H...O and N...H/H...N) is 8.1%–12.5% and 0.0%–1.4%. The contribution of the strongest hydrogen bonds O...H and H...O is almost the same in all structures while that of H...N and N...H bonds is minor.

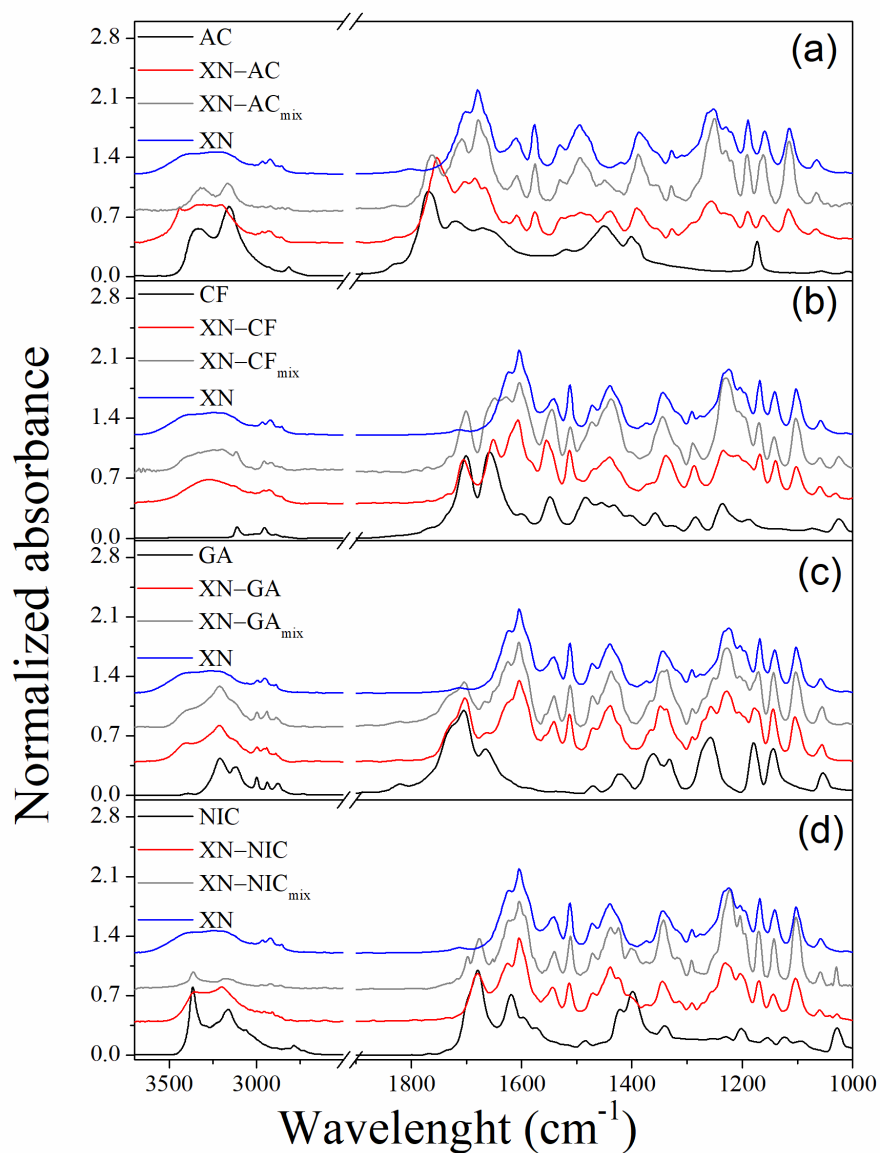

**Figure S4.** FTIR spectra for the coformers, the target cocrystals, and physical mixtures. All spectra were normalized at the maximum intensity in the range between 1750–600  $\text{cm}^{-1}$ .

**Table S1.** Band assignment for the data acquired from the FTIR spectroscopy.

| Vibrational assignment                                                    | XN   | XN-NIC | XN-GA | XN-CF | XN-AC |
|---------------------------------------------------------------------------|------|--------|-------|-------|-------|
| $\nu(\text{NH})$                                                          |      |        |       |       | 3440  |
|                                                                           | 3390 | 3352   | 3389  |       |       |
| $\nu(\text{OH})$ , $\nu(\text{CH})$ in aromatic ring                      | 3189 | 3191   | 3192  |       | 3202  |
|                                                                           |      |        |       | 3277  |       |
| $\nu_{\text{as}}(\text{OCH}_3)$                                           | 2963 |        | 2970  | 2928  | 2929  |
|                                                                           | 2915 | 2908   | 2911  |       | 2856  |
| $\nu_{\text{s}}(\text{OCH}_3)$                                            | 2855 |        | 2854  |       |       |
|                                                                           |      |        | 1730  | 1734  |       |
|                                                                           |      |        | 1704  | 1704  |       |
| Amide I                                                                   |      | 1680   | 1683  | 1651  | 1667  |
| $\nu(\text{C}=\text{O})$                                                  | 1626 | 1623   | 1627  | 1616  | 1625  |
| $\nu(\text{CC})$                                                          | 1604 | 1603   | 1604  | 1608  | 1608  |
|                                                                           |      |        |       |       | 1593  |
| Amide II, $\nu(\text{C}=\text{N})$ , <i>trans</i> $-\text{CH}=\text{CH}-$ | 1542 | 1545   | 1543  | 1554  | 1542  |
| $\delta(\text{CC})$                                                       | 1513 | 1512   | 1512  | 1512  | 1510  |
|                                                                           | 1471 | 1471   | 1471  | 1471  | 1471  |
|                                                                           | 1440 | 1439   | 1437  | 1442  | 1438  |
| $\nu(\text{CN})$ , $\delta(\text{NH})$                                    |      | 1402   |       |       | 1391  |
|                                                                           | 1343 | 1344   | 1348  | 1340  | 1345  |
| $\nu(\text{CC})$ in aromatic ring                                         | 1291 | 1292   | 1292  | 1287  | 1292  |
| $\delta(\text{OH})$                                                       | 1257 | 1257   | 1257  |       | 1257  |
|                                                                           | 1224 | 1231   | 1227  | 1232  | 1227  |
|                                                                           | 1170 | 1169   | 1175  | 1169  | 1170  |
| $\nu(\text{CC})$ in aromatic ring, $\nu(\text{OH})$                       | 1142 | 1142   | 1143  | 1137  | 1142  |
|                                                                           | 1101 | 1103   | 1103  | 1101  | 1104  |
| Substituted benzene                                                       | 1059 | 1061   | 1055  | 1057  | 1059  |

\* $\nu$ —stretching mode,  $\delta$ —bending in plane, s—symmetric vibrations, as—asymmetric vibrations.

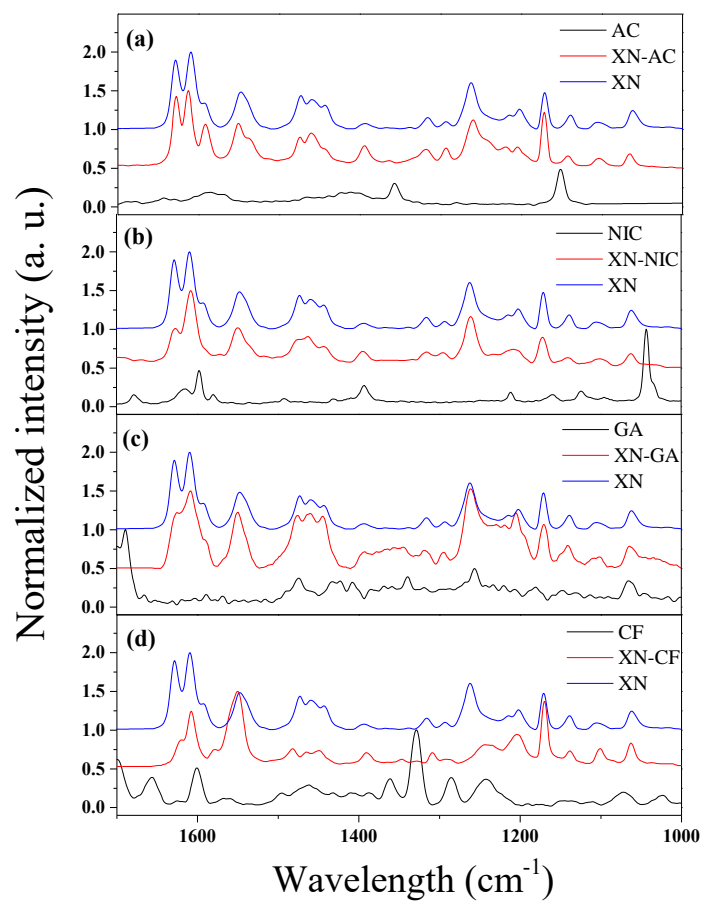

**Figure S5.** Raman spectra of coformers, the target cocrystals, and XN crystal. (a) XN-NIC, (b) XN-GA, (c) XN-AC, and (d) XN-CF. All Raman spectra were normalized to the most intense band in the range 1750–600 cm<sup>-1</sup>.



**Table S2.** Band assignments for the data acquired from Raman spectroscopy.

| Vibrational assignments                                                     | XN   | XN-NIC | XN-GA | XN-AC | XN-CF |
|-----------------------------------------------------------------------------|------|--------|-------|-------|-------|
| $\nu(\text{C}=\text{O})$                                                    | 1628 | 1627   | 1624  | 1627  | 1620  |
| $\nu(\text{C}=\text{C})$ in ring B,<br>$\delta(\text{NH})$ of $\text{NH}_2$ | 1610 | 1607   | 1608  | 1612  | 1608  |
| $\nu(\text{C}=\text{C})$ ring A                                             | 1592 | 1584   | 1589  | 1592  | 1580  |
| $\delta(\text{CH})$                                                         | 1547 | 1547   | 1550  | 1550  | 1549  |
| $\nu(\text{OCH}_3)$ in ring A                                               |      |        |       | 1538  |       |
| $\nu(\text{OCH}_3)$ in ring A                                               | 1473 | 1475   | 1476  | 1474  | 1482  |
| $\delta(\text{CH}_3)$                                                       | 1458 | 1463   | 1461  | 1460  | 1464  |
|                                                                             | 1442 | 1442   | 1444  | 1442  | 1449  |
| $\nu(\text{CH}_2), \nu(\text{CN})$                                          | 1392 | 1395   | 1395  | 1394  | 1390  |
| $\nu(\text{CH}_3), \delta(\text{CH}_3)$                                     |      |        |       |       |       |
| $\delta(\text{CH}=\text{CH})$ in ring B                                     | 1316 | 1317   | 1317  | 1318  | 1309  |
| $\delta(\text{OH})$ in ring A                                               | 1292 | 1296   | 1294  | 1293  | 1292  |
|                                                                             | 1262 | 1261   | 1261  | 1260  | 1245  |
|                                                                             | 1202 | 1204   | 1204  | 1205  | 1203  |
| $\delta(\text{OH})$ in ring B                                               | 1171 | 1171   | 1170  | 1171  | 1170  |
| $\delta(\text{NH})$                                                         | 1138 | 1139   | 1140  | 1143  | 1138  |
|                                                                             | 1104 | 1102   | 1102  | 1104  | 1100  |
| $\delta(\text{C}-\text{C})$                                                 | 1061 | 1062   | 1062  | 1065  | 1062  |

\* $\nu$ —stretching mode,  $\delta$ —bending in-plane.

a)

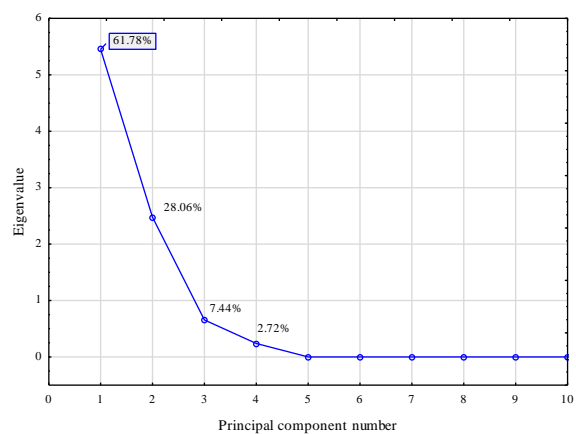

b)

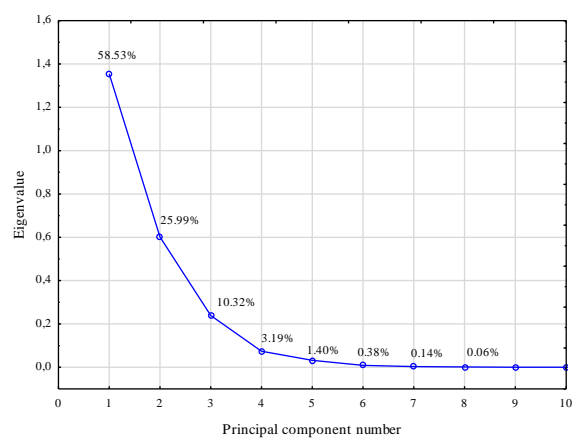

c)

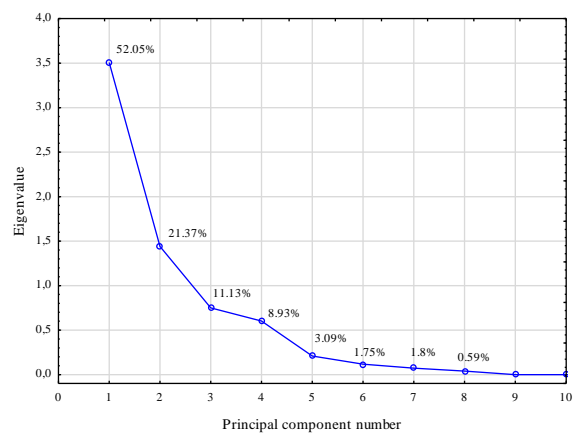

**Figure S6.** Scree plot obtained from PCA. (a) Raman spectroscopy in the range 1700–1000 cm<sup>-1</sup>, (b) FTIR spectroscopy in the range 3700–2700 cm<sup>-1</sup>, and (c) 1800–1000 cm<sup>-1</sup>.

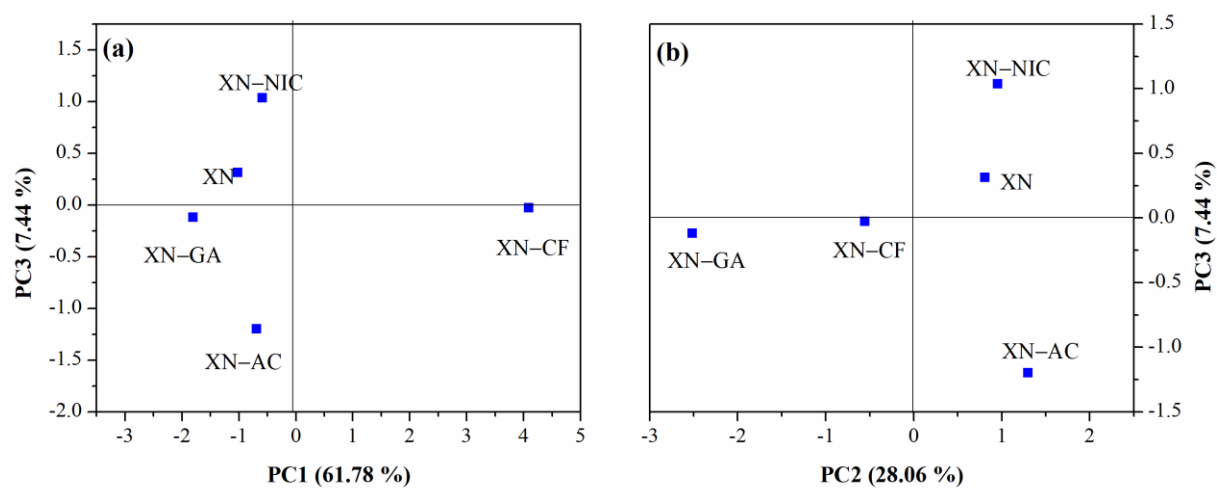

**Figure S7.** PCA 2D score plots: (a) PC1 and PC3 and (b) PC2 and PC3 calculated based on Raman spectroscopy data.

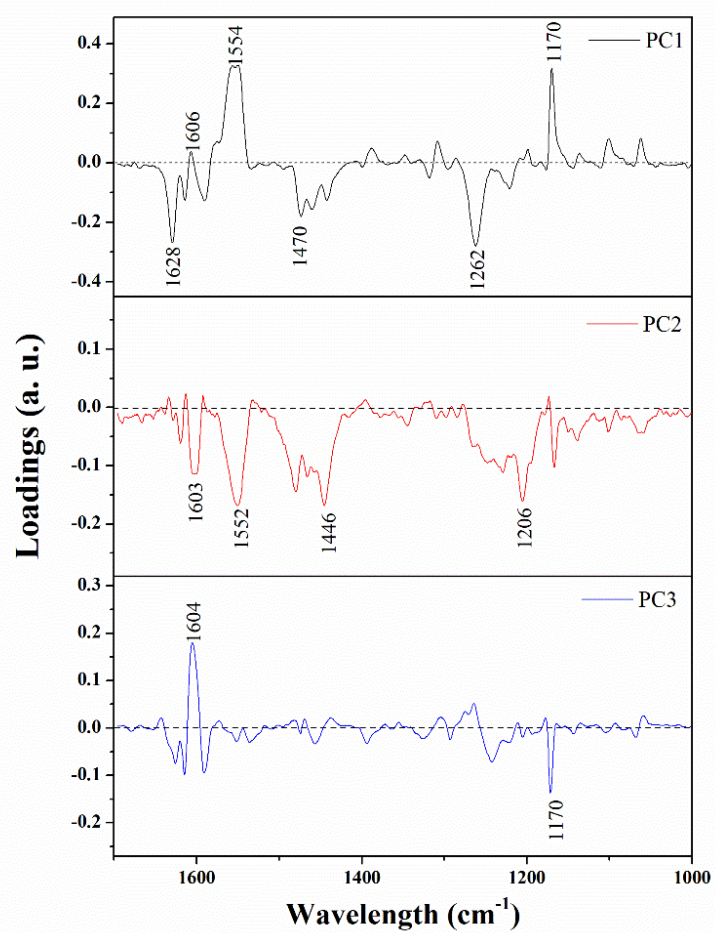

**Figure S8.** PC1, PC2, and PC3 correlation loading plots.

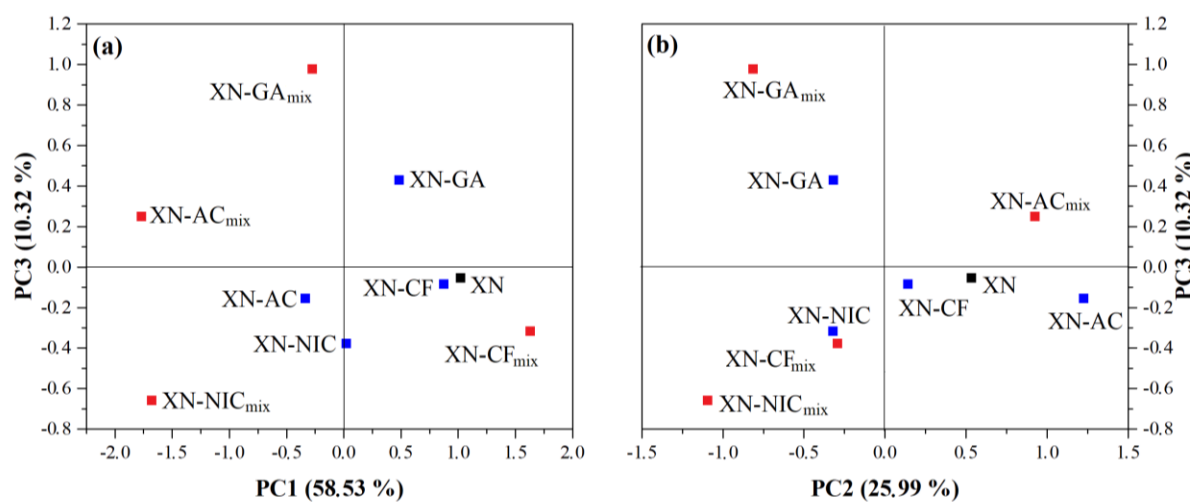

**Figure S9.** PCA 2D score plot: (a) PC1 and PC3 and (b) PC2 and PC3 calculated based on the FTIR data in the range 3700–2700  $\text{cm}^{-1}$  (red symbols represent the physical mixtures, blue symbols represent the cocrystals, black symbols represent XN).

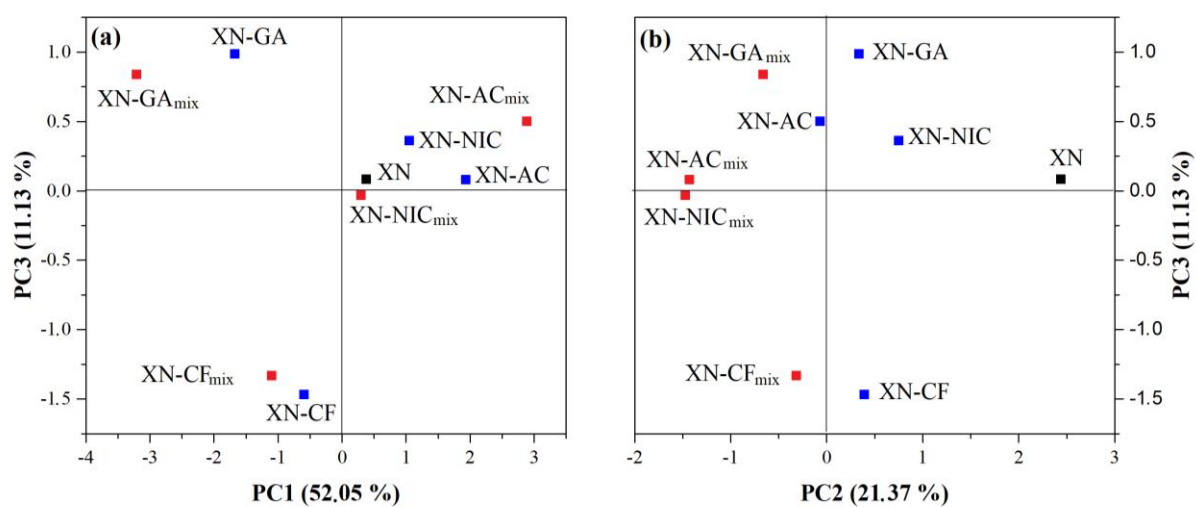

**Figure S10.** PCA 2D score plot: (a) PC1 and PC3 and (b) PC2 and PC3 calculated based on the FTIR data in the range 1800–1000 cm<sup>-1</sup> (red symbols represent the physical mixtures, blue symbols represent the cocrystals, black symbols represent XN).

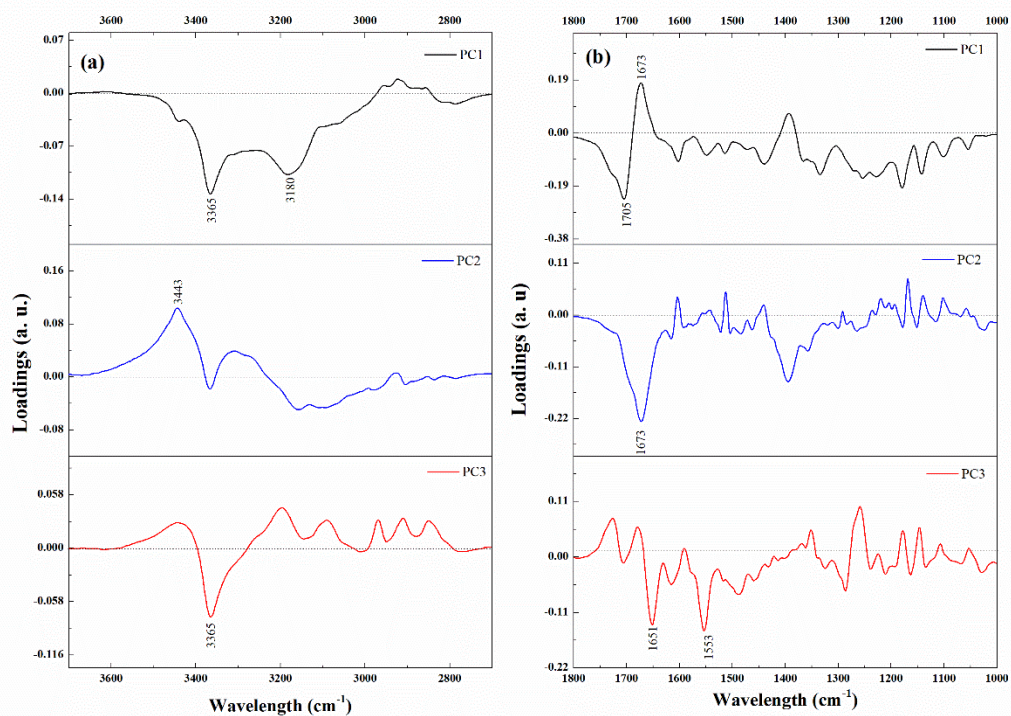

**Figure S11.** PC1, PC2, and PC3 correlation loading plots. The regions (a) 3700–2700  $\text{cm}^{-1}$  and (b) 1800–1000  $\text{cm}^{-1}$ .

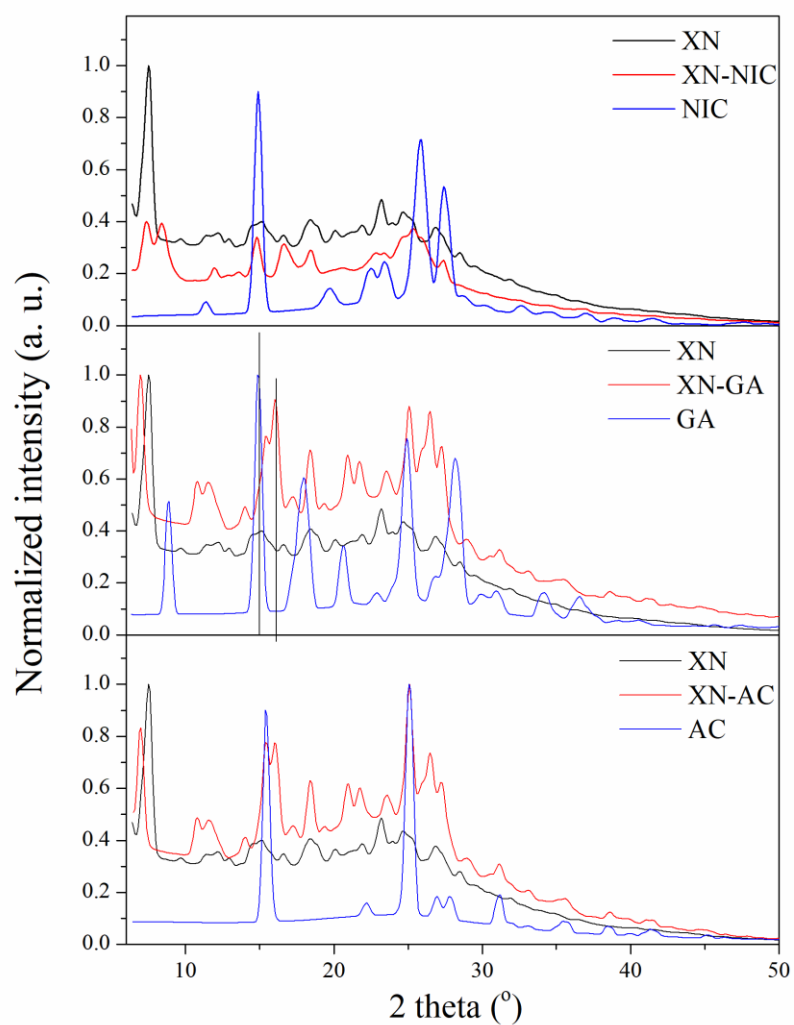

**Figure S12.** X-ray powder diffraction patterns obtained after XN grinding with selected coformers (NIC, AC, and GA). Based on the data it is difficult to conclude if the samples are cocrystals or a physical mixture of compounds.
